# Supplementary material for: Modulation of the Osteosarcoma Expression Phenotype by MicroRNAs
Source: PLoS One. 2012 Oct 25;7(10):e48086. doi: 10.1371/journal.pone.0048086 (PMC3485010; doi:10.1371/journal.pone.0048086)
Supplement: Table S1 — Overview of cell lines, clinical samples and normal bone used in the study. (XLS) [file pone.0048086.s002.xls]

## Sheet: Sheet1
Supporting Information Table S1
Overview of cell lines, clinical samples and normal bone used in the study.
Overview of samples used for the different experiments
	miRNA expression	mRNA genome-wide expression	qRT-PCR
Osteosarcoma clinical samples		71	12
Osteosarcoma cell lines	19	19
Normal bones	4*	4*	6#
Osteoblasts	2		5
* 2 bones from the Norwegian Radium Hospital and 2 bones from Capital Bioscience, Gaithersburg, MD, USA)
# 4 bones from the Norwegian Radium Hospital, 1 bone from University College London and 2 bones from Capital Bioscience
Clinical data for osteosarcoma tumors collected at the Norwegian Radium Hospital
Sample	Sample origin	Patient age (years)/sex	Subtype	Grade	Primary location	Chemotherapy	Status
OS7	Primary tumor	26/male	Osteoblastic	4	Femur	Yes	No evidence of disease
OS14	Primary tumor	14/female	Osteoblastic/fibroblastic	4	Femur	Yes	Dead of disease
OS29	Primary tumor	27/female	Osteoblastic	4	Pelvis	No	Dead of disease
OS46-1	Primary tumor	17/male	Chondroblastic	4	Pelvis	No	Dead of disease
OS59	Primary tumor	12/female	Osteoblastic	4	Femur	No	No evidence of disease
OS75	Primary tumor	16/male	Osteoblastic/teleangiectatic	4	Costa	No	Alive with disease
OS83	Primary tumor	18/male	Osteoblastic	4	Tibia	No	Alive with disease
OS86-2	Primary tumor	20/male	Osteoblastic	4	Femur	Yes	No evidence of disease
OS94-1	Primary tumor	33/female	Osteoblastic	4	Tibia	No	Dead of disease
OS97	Primary tumor	12/male	Osteoblastic/chondroblastic	4	Femur	No	Dead of disease
OS99	Primary tumor	33/male	Osteoblastic	4	Pelvis	No	Dead of disease
OS110	Primary tumor	20/male	Osteoblastic/teleangiectatic	4	Femur	No	Dead of disease
Clinical data for normal samples
Sample	Sample origin	Patient age (years)/sex	Sample location
Bone1	Bone from cancer renis patient, bone metastasis. Norwegian Radium Hospital.	52/ male	Femur, cortical bone
Bone2	Bone from patient with osteosarcoma (Parosteal, periosteal). Norwegian Radium Hospital.	20/ male	Tibia
Bone3	Bone from Capital Bioscience	26 / male	NA
Bone4	Bone from Capital Bioscience	72 / female	NA
Bone5	Bone from patient with osteosarcoma. Norwegian Radium Hospital.	10/ male	Fibula
Bone6	Bone from patient with osteosarcoma (osteoblastic). University College London.	15/ female	Tibia
Bone7	Bone from patient with Giant cell tumour of bone. Norwegian Radium Hospital.	4 / female	Clavicle
